# Supplementary material
Source: HighWire-hosted journal article supplement (http://www.cmaj.ca/highwire/filestream/68580/field_highwire_adjunct_files/1/161485-res-10-at.pdf)

**Appendix 10 (as supplied by the authors):** Sensitivity analysis for meta-analytic estimates-excluding one data source at a time

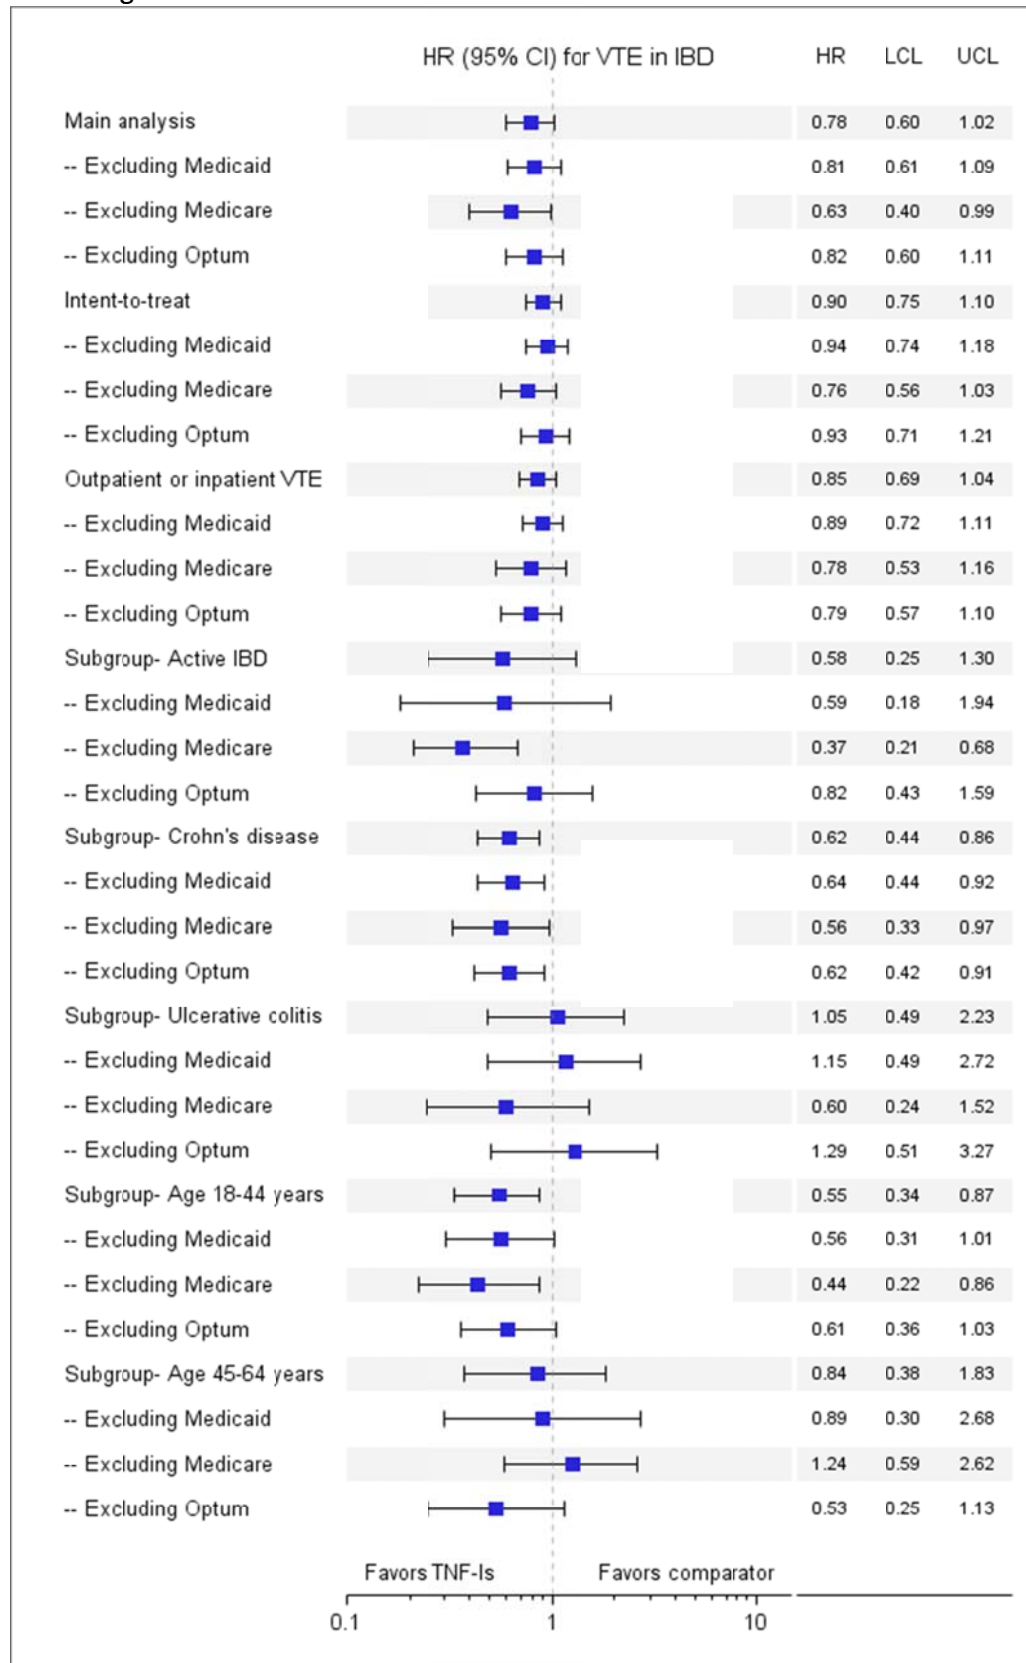

Supplement: 161485-res-10-at.pdf [file 161485-res-10-at.pdf]
